# Supplementary material for: The double role of p-toluenesulfonic acid in the formation of ZnO particles with different morphologies
Source: Royal Society of Chemistry journal article supplement (doi:10.1039/b924412n), 2010-01-01
Supplement: b924412n.pdf [file b924412n.pdf]

## Electronic Supplementary Information

### The Double Role of p-Toluenesulfonic Acid in the Formation of ZnO Particles with Different Morphologies

Gabriela Ambrožič,<sup>a</sup> Igor Djerdj,<sup>b,c</sup> Srečo D. Škapin,<sup>d</sup> Majda Žigon<sup>a</sup> and Zorica Crnjak Orel<sup>\*a</sup>

<sup>a</sup> National Institute for Chemistry, Hajdrihova 19, SI-1000 Ljubljana, Slovenia

<sup>b</sup> Ruđer Bošković Institute, Bijenička 54, 10000 Zagreb, Croatia

<sup>c</sup> Laboratory for Multifunctional Materials, Department of Materials, ETH Zurich, Wolfgang-Pauli-Strasse 10, 8093 Zurich, Switzerland

<sup>d</sup> Jozef Stefan Institute, Jamova 2, SI-1000 Ljubljana, Slovenia

\* E-mail: [zorica.crnjak.orel@ki.si](mailto:zorica.crnjak.orel@ki.si), Fax: +386 1 4760 300; Tel: +386 1 4760 236

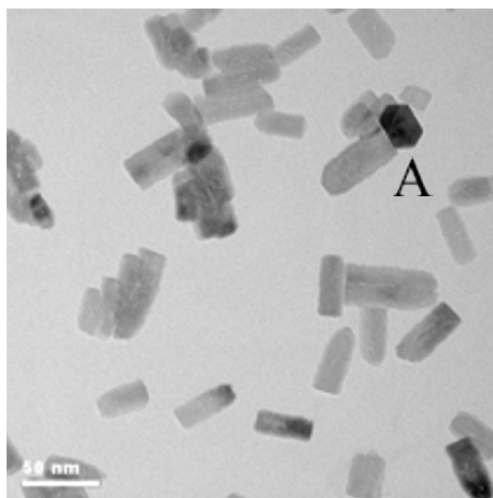

**Fig. S1.** TEM image of the sample prepared with the assistance of p-TSA (0.02 mmol, 5 h) showing a hexagonal shape of the nanorod s cross-section (denoted with A).
